# Supplementary material
Source: MDPI journal article supplement (https://www.mdpi.com/2073-4352/8/12/457)
Supplement: s1 [file s1]

# Supplementary Materials: Cyclodextrin-Driven Formation of Double Six-Ring (D6R) Silicate Cage: NMR Spectroscopic Characterization from Solution to Crystal Phase

Mohamed Haouas, Clément Falaise, Charlotte Martineau-Corcos and Emmanuel Cadot

## 1. FT-IR and TGA of $K_{12}Si_{12}O_{30} \cdot 2\alpha\text{-CD} \cdot 36H_2O$

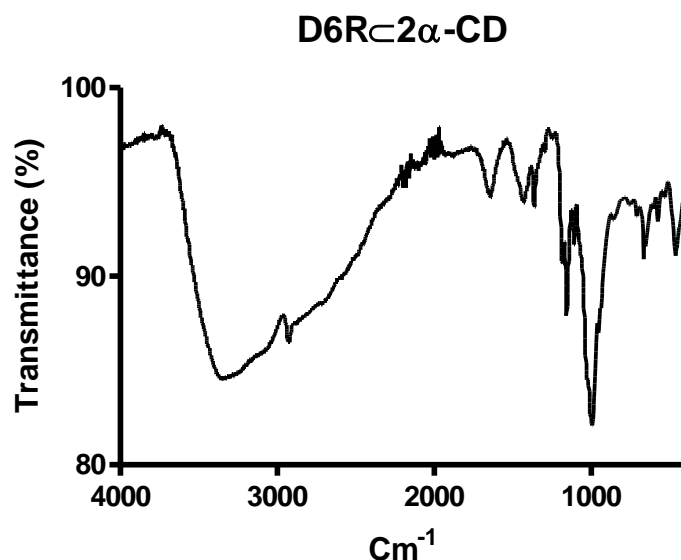

Figure S1. FT-IR spectrum of  $K_{12}Si_{12}O_{30} \cdot 2\text{-CD} \cdot 36H_2O$ .

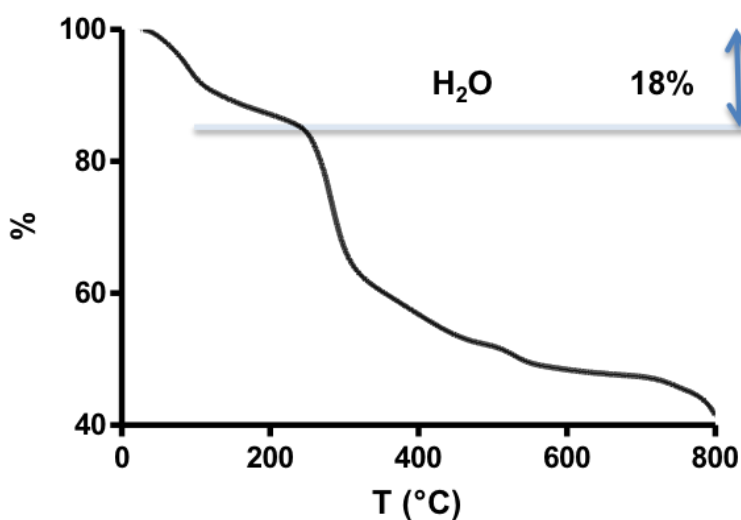

Figure S2. TGA curve of  $K_{12}Si_{12}O_{30} \cdot 2\text{-CD} \cdot 36H_2O$ .

## 2. Crystallographic structure of $K_{12}Si_{12}O_{30} \bullet 2\alpha$ -CD

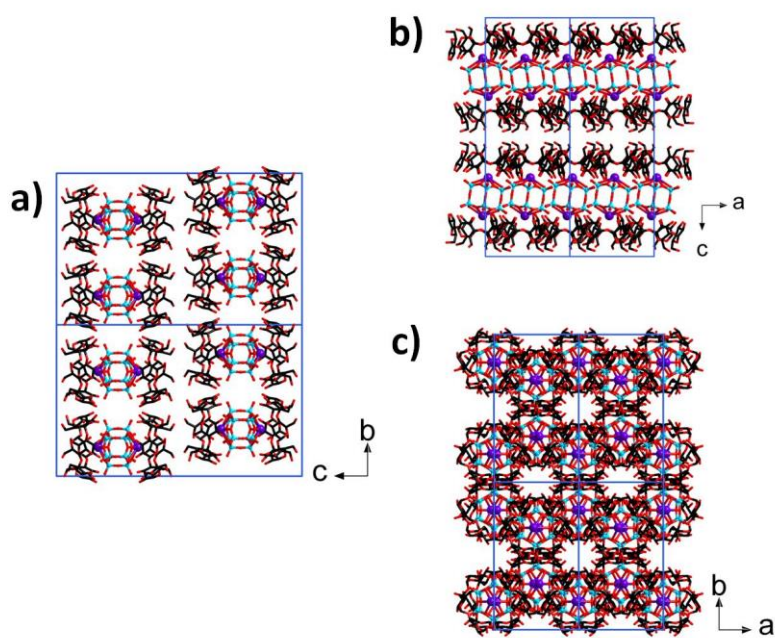

**Figure S3.** Crystallographic views of  $K_{12}Si_{12}O_{30} \bullet 2\alpha$ -CD along (a) [100], (b) [010], and (c) [001].

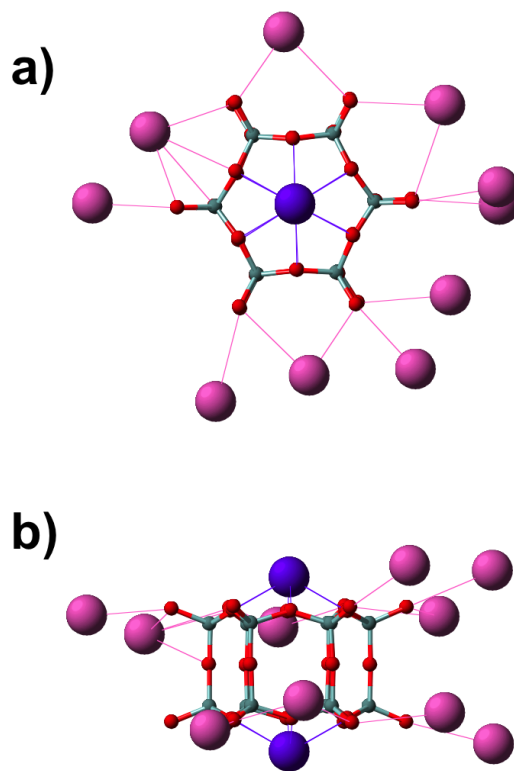

**Figure S4.** Disposition of K around the silicate cage in the triclinic form of  $K_{12}Si_{12}O_{30} \bullet 2\alpha$ -CD. Top (a) and side (b) views with respect to the  $D_6$  symmetry axis of the prismatic unit.

### 3. Effect of KCl on $^1\text{H}$ NMR of synthesis medium of D6R@ $\alpha$ -CD

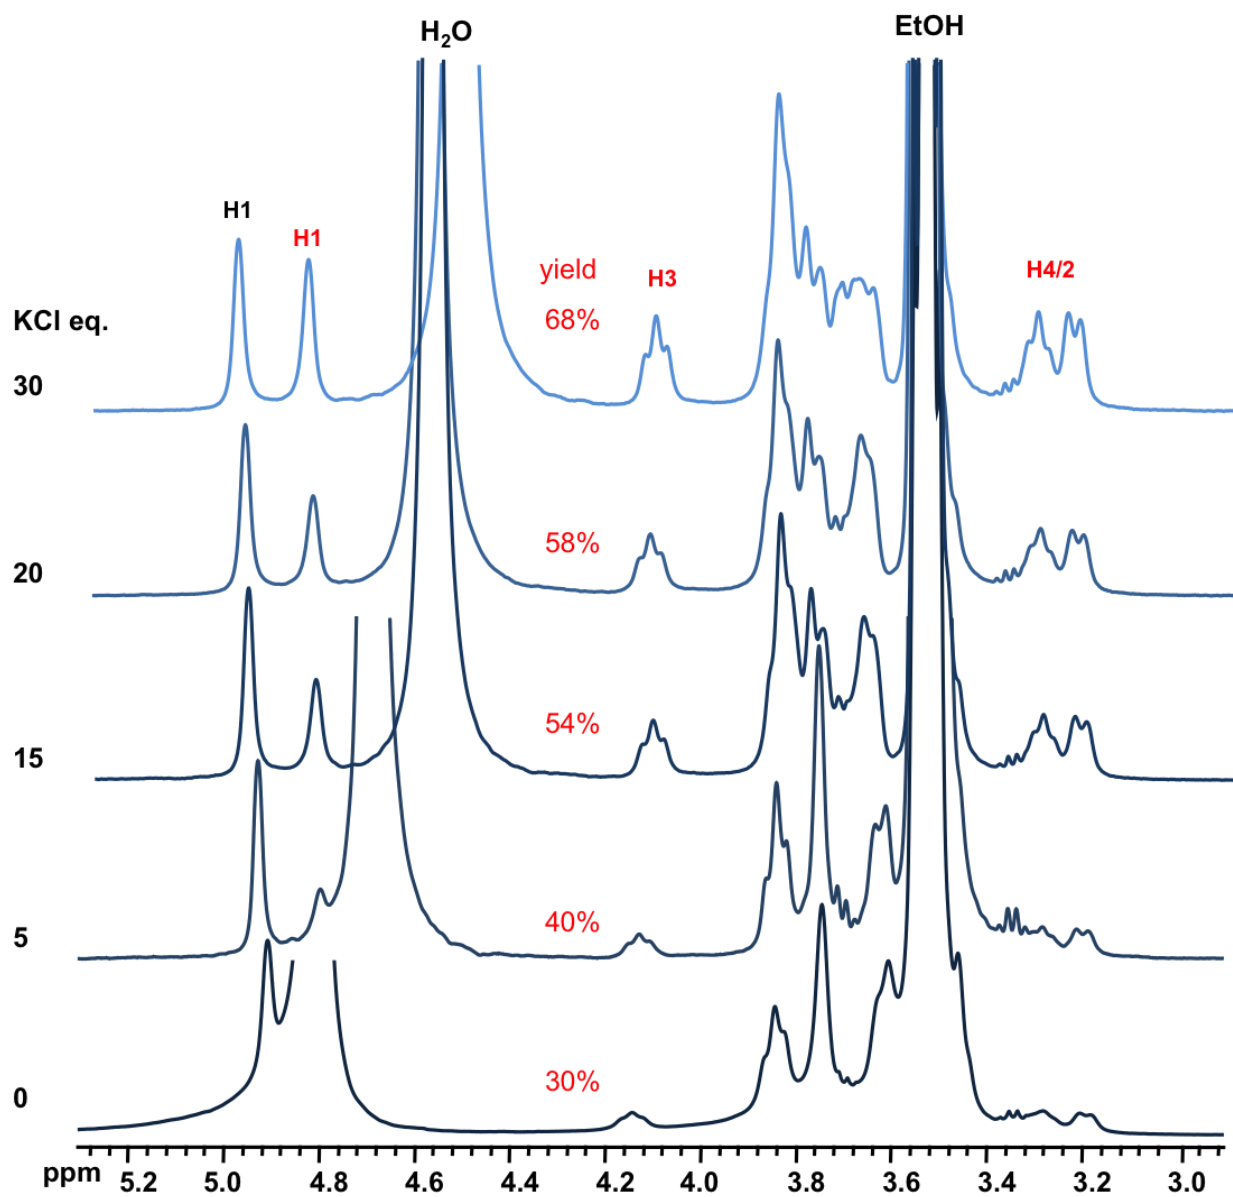

**Figure S5.**  $^1\text{H}$  NMR spectra of the synthesis medium in the system 1  $\alpha$ -CD : 6 TEOS : 6 KOH : 700  $\text{D}_2\text{O}$  :  $x$  KCl,  $x = 0, 5, 15, 20$ , and  $30$ . The solutions were equilibrated for at least one week.

#### 4. Effect of temperature on D6R@ $\alpha$ -CD stability

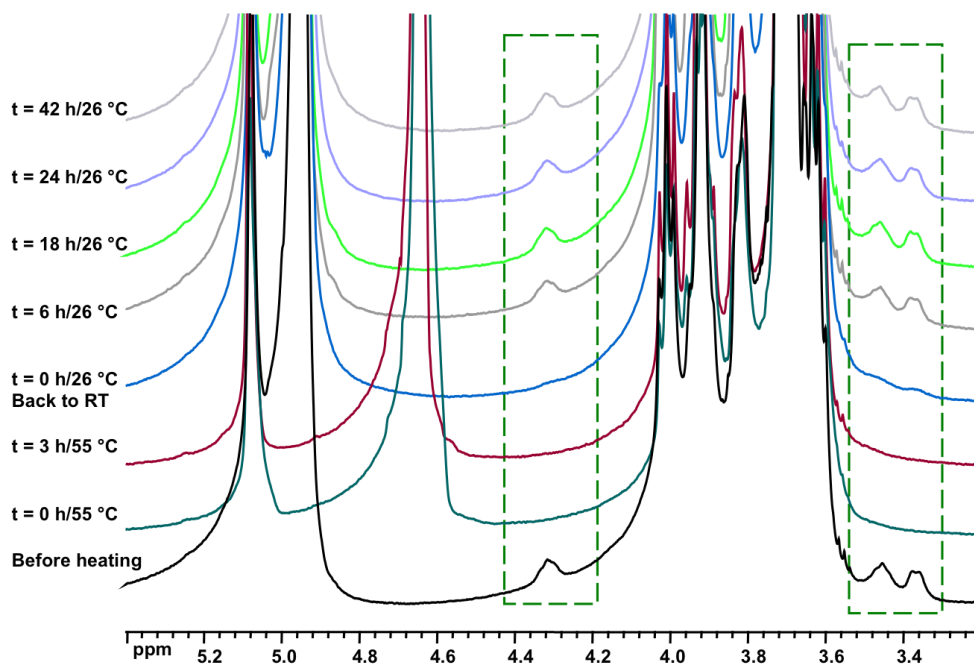

**Figure S6.** Variable temperature  $^1\text{H}$  NMR spectra of equilibrated solution in the system 1  $\alpha$ -CD : 6 TEOS : 6 KOH : 400  $\text{D}_2\text{O}$ .

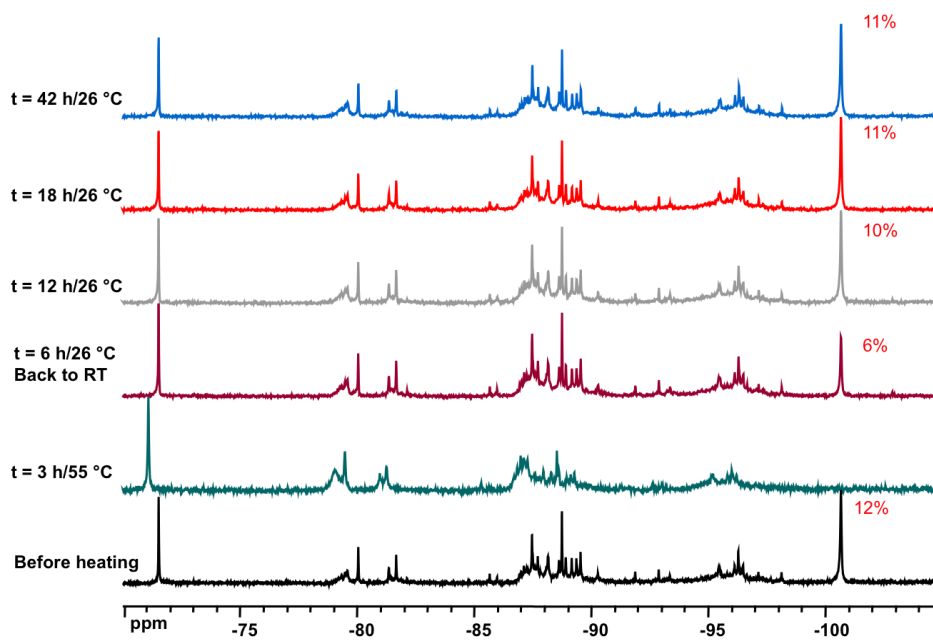

**Figure S7.** Variable temperature  $^{29}\text{Si}$  NMR spectra of equilibrated solution in the system 1  $\alpha$ -CD: 6 TEOS: 6 KOH: 400  $\text{D}_2\text{O}$ .

5.  $^{13}\text{C}$  CPMAS NMR of D6R@ $\alpha$ -CD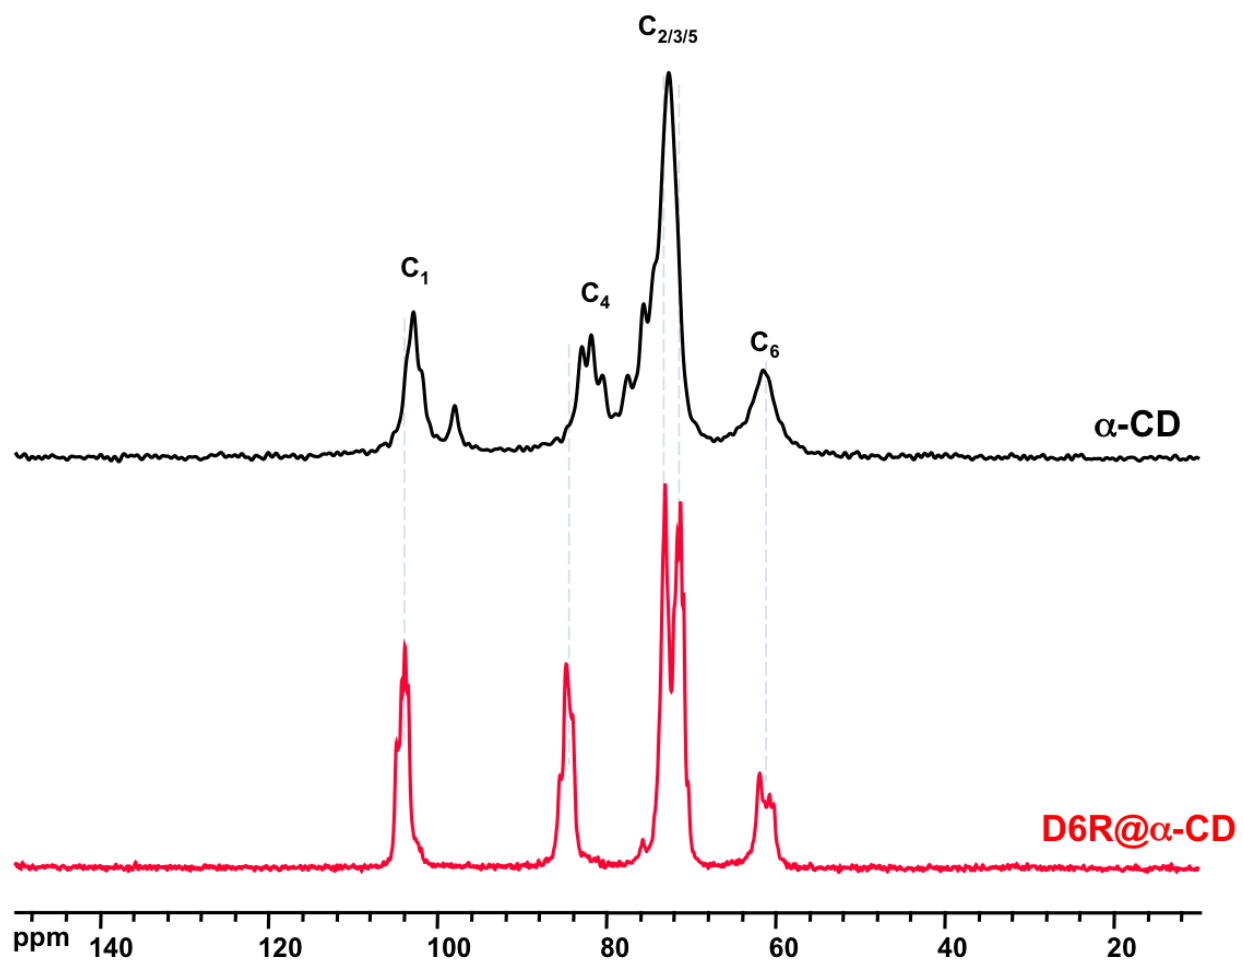

Figure S8.  $^{13}\text{C}$  CPMAS NMR spectra of D6R@ $\alpha$ -CD and  $\alpha$ -CD for comparison.
